# Supplementary material
Source: HighWire-hosted journal article supplement (https://bmjopenquality.bmj.com/highwire/filestream/141425/field_highwire_adjunct_files/0/bmjoq-2020-001072supp001_data_supplement.pdf)
Supplement: bmjoq-2020-001072supp001_data_supplement.pdf [file bmjoq-2020-001072supp001_data_supplement.pdf]

## Supplement Figures and Figure Legends

Figure S1

| <b>Referral review</b>             |                          |                       |
|------------------------------------|--------------------------|-----------------------|
| <b>Heart failure history</b>       |                          | <b>Considerations</b> |
| NYHA classification                | <input type="checkbox"/> | .....                 |
| CMP Etiology                       | <input type="checkbox"/> | .....                 |
| OMT ( $\geq 6$ months)             | <input type="checkbox"/> | .....                 |
| Antiplatelet therapy               | <input type="checkbox"/> | .....                 |
| Anticoagulation                    | <input type="checkbox"/> | .....                 |
| Brady- and/or tachyarrhythmias     | <input type="checkbox"/> | .....                 |
| Upgrade                            | <input type="checkbox"/> | .....                 |
| Pacemaker/Lead details             | <input type="checkbox"/> | .....                 |
| <b>Additional evaluation</b>       |                          | <b>Considerations</b> |
| 12-lead ECG (QRS ms, QRS morph)    | <input type="checkbox"/> | .....                 |
| Holter (VPB/SVT/NSVT)              | <input type="checkbox"/> | .....                 |
| Echocardiography (EF, RV function) | <input type="checkbox"/> | .....                 |
| Ischemia detection                 | <input type="checkbox"/> | .....                 |
| Add cardiac imaging (CMR, biopsy)  | <input type="checkbox"/> | .....                 |
| <b>Co-morbidities</b>              |                          | <b>Considerations</b> |
| Thyroid disease                    | <input type="checkbox"/> | .....                 |
| COPD                               | <input type="checkbox"/> | .....                 |
| OSAS                               | <input type="checkbox"/> | .....                 |
| Diabetes                           | <input type="checkbox"/> | .....                 |
| Renal insufficiency (GFR/dialyses) | <input type="checkbox"/> | .....                 |
| (treated) Malignancies             | <input type="checkbox"/> | .....                 |
| Cachexia or obesity                | <input type="checkbox"/> | .....                 |
| Anemia / Iron deficiency           | <input type="checkbox"/> | .....                 |
| Patient life-expectancy            | <input type="checkbox"/> | .....                 |

**Figure S1. Referral review checklist.** Considerations to be checked at referral review, to ascertain completeness of indication and possible complicating factors for the procedure, follow up and probability of beneficial response to CRT.

*CMP = cardiomyopathy. CMR = cardiac magnetic resonance imaging. COPD = chronic obstructive pulmonary disease. EF = Ejection fraction. GFR = glomerular filtration rate. NSVT = non-sustained*

ventricular tachycardias. NYHA = New York Heart Association. OMT = optimal medical treatment. OSAS = obstructive sleep apnea syndrome. QRS ms = QRS-duration in milliseconds. QRS morph = QRS-morphology. RV = right ventricle. SVT = supraventricular tachycardias. VPBs = ventricular premature beats.

Figure S2

## Pre-assessment checklist

| <b>Procedural considerations</b>        | <b>Check</b>             | <b>Action</b> |
|-----------------------------------------|--------------------------|---------------|
| • Allergies                             | <input type="checkbox"/> | .....         |
| • Diabetes (oral/insulin)               | <input type="checkbox"/> | .....         |
| • Anticoagulation                       | <input type="checkbox"/> | .....         |
| • Antiplatelet agents                   | <input type="checkbox"/> | .....         |
| • Antibiotics                           | <input type="checkbox"/> | .....         |
| • Sedation protocol                     | <input type="checkbox"/> | .....         |
| • Discharge planning                    | <input type="checkbox"/> | .....         |
| • Informed consent                      | <input type="checkbox"/> | .....         |
| <br>                                    |                          |               |
| <b>Contra-indications/complications</b> | <b>Check</b>             | <b>Action</b> |
| • Complaints                            | <input type="checkbox"/> | .....         |
| • Physical (pocket side)                | <input type="checkbox"/> | .....         |
| • Laboratory                            | <input type="checkbox"/> | .....         |
| • Chest X-ray (lead positions)          | <input type="checkbox"/> | .....         |
| <br>                                    |                          |               |
| <b>Information and follow-up</b>        | <b>Check</b>             | <b>Action</b> |
| • Restrictions arm movement             | <input type="checkbox"/> | .....         |
| • Drivers licence                       | <input type="checkbox"/> | .....         |
| • Follow-up procedure                   | <input type="checkbox"/> | .....         |
| • Cardiac rehabilitation                | <input type="checkbox"/> | .....         |
| • Remote monitoring                     | <input type="checkbox"/> | .....         |

**Figure S2. Pre-assessment checklist.** Designed to ascertain thorough procedural planning and therefore eliminating unpredictable situations during and after implantation for physician as well as patient.

Figure S3

| <b>Pre-discharge check-up</b>               |                          |                      |
|---------------------------------------------|--------------------------|----------------------|
| <b><i>CRT device and implant check</i></b>  | <b><i>Check</i></b>      | <b><i>Action</i></b> |
| • Device check-up                           | <input type="checkbox"/> | .....                |
| • Chest X-ray                               | <input type="checkbox"/> | .....                |
| • 12-lead ECG                               | <input type="checkbox"/> | .....                |
| • Pocket wound check up                     | <input type="checkbox"/> | .....                |
| <b><i>Follow-up advice and planning</i></b> | <b><i>Check</i></b>      | <b><i>Action</i></b> |
| • Medication advice CRT specialist          | <input type="checkbox"/> | .....                |
| • Anticoagulation strategy                  | <input type="checkbox"/> | .....                |
| • Patient education (do's and don'ts)       | <input type="checkbox"/> | .....                |
| • Drivers licence                           | <input type="checkbox"/> | .....                |
| • Remote monitoring start up                | <input type="checkbox"/> | .....                |
| • Follow-up appointments planned            | <input type="checkbox"/> | .....                |

**Figure S3. Pre-discharge checklist.** Completing this check-up makes sure short-term complications have been ruled out and patient has been educated and will be followed to minimize the chance of mid- to long-term complications.

*CRT = cardiac resynchronisation therapy.*

Figure S4

| <b>Optimization checklist</b>                                |                          | <i>Considerations</i> |
|--------------------------------------------------------------|--------------------------|-----------------------|
| <b><i>Heart failure evaluation</i></b>                       |                          |                       |
| Decompensated HF                                             | <input type="checkbox"/> | .....                 |
| OMT                                                          | <input type="checkbox"/> | .....                 |
| Compliance evaluation<br>(fluid restriction/diet/intox/meds) | <input type="checkbox"/> | .....                 |
| Reasons deterioration HF                                     | <input type="checkbox"/> | .....                 |
| <b><i>Considerations</i></b>                                 |                          |                       |
| <b><i>Electrocardiographic/device evaluation</i></b>         |                          |                       |
| Underlying narrow QRS complex                                | <input type="checkbox"/> | .....                 |
| < 95% biventricular pacing                                   | <input type="checkbox"/> | .....                 |
| Arrhythmias (VPB/SVT/NSVT)                                   | <input type="checkbox"/> | .....                 |
| <b><i>Considerations</i></b>                                 |                          |                       |
| <b><i>Echocardiographic evaluation</i></b>                   |                          |                       |
| Structural worsening of disease                              | <input type="checkbox"/> | .....                 |
| Increased filling pressures                                  | <input type="checkbox"/> | .....                 |
| Suboptimal AV timing                                         | <input type="checkbox"/> | .....                 |
| Primary RV dysfunction                                       | <input type="checkbox"/> | .....                 |
| <b><i>Considerations</i></b>                                 |                          |                       |
| <b><i>LV-lead position evaluation</i></b>                    |                          |                       |
| Chest X-ray lead position                                    | <input type="checkbox"/> | .....                 |
| scar region evaluation                                       | <input type="checkbox"/> | .....                 |
| <b><i>Considerations</i></b>                                 |                          |                       |
| <b><i>Co-morbidities</i></b>                                 |                          |                       |
| Anemia / Iron deficiency                                     | <input type="checkbox"/> | .....                 |
| Renal dysfunction                                            | <input type="checkbox"/> | .....                 |
| Deconditioning                                               | <input type="checkbox"/> | .....                 |
| Psychological status                                         | <input type="checkbox"/> | .....                 |
| Others*                                                      | <input type="checkbox"/> | .....                 |

**Figure S4. Optimisation checklist.** Structured check-up for optimisation of heart failure patients with CRT. Incorporating previously identified factors contributing to suboptimal benefit from therapy.

Adapted with permission from Mullens et al. <sup>14</sup>

\* = other comorbidities identified at referral review (figure 1).

*AV = atrioventricular. HF = heart failure. Intox = intoxications. LV = left ventricular. NSVT = non-sustained ventricular tachycardias. OMT = optimal medical therapy. RV= right ventricular. SVT = supraventricular tachycardias. VPB= ventricular premature beats.*
